# Supplementary material for: Integrative In Vivo Drug Testing Using Gene Expression Signature and Patient-Derived Xenografts from Treatment-Refractory HER2 Positive and Triple-Negative Subtypes of Breast Cancer
Source: Cancers (Basel). 2019 Apr 23;11(4):574. doi: 10.3390/cancers11040574 (PMC6520730; doi:10.3390/cancers11040574)
Supplement: Supplementary file 1 [file cancers-11-00574-s001.pdf]

# Supplementary Materials: Integrative In Vivo Drug Testing Using Gene Expression Signature and Patient-Derived Xenografts from Treatment-Refractory HER2 Positive and Triple-Negative Subtypes of Breast Cancer

Jin-Sun Ryu, Sung Hoon Sim, In Hae Park, Eun Gyeong Lee, Eun Sook Lee, Yun-Hee Kim, Youngmee Kwon, Sun-Young Kong and Keun Seok Lee

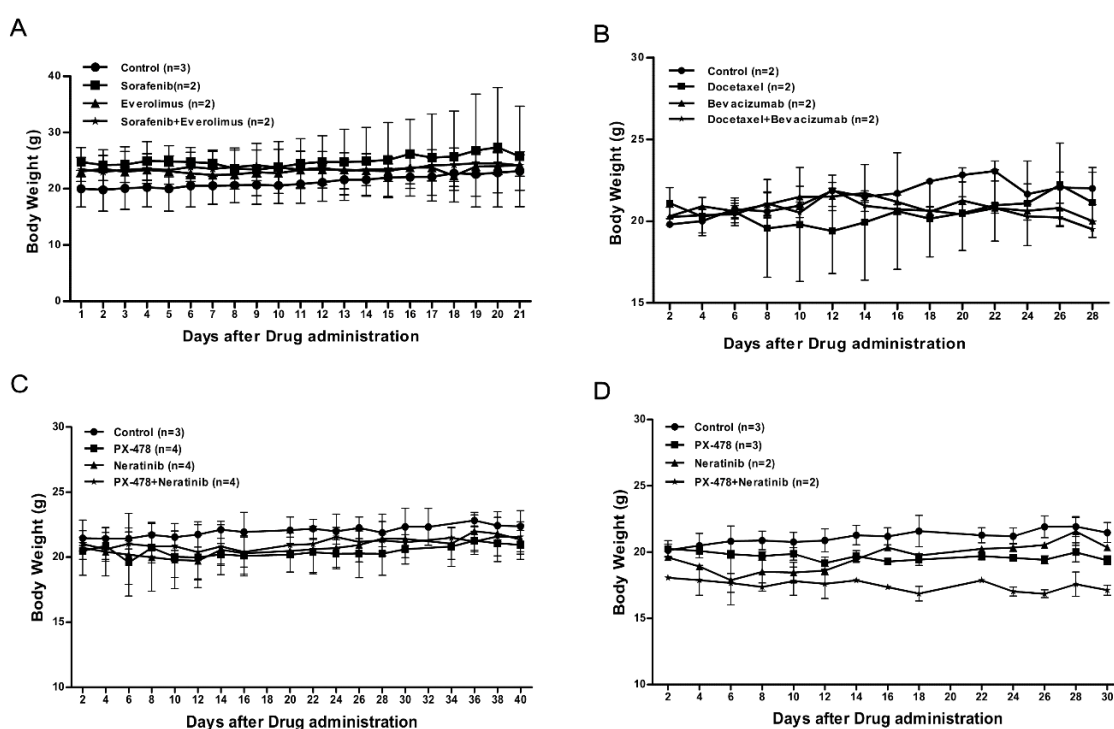

**Figure S1.** Changes in body weight in PDX model mice following treatment with drugs. **(A)** Body weights of patient-derived xenograft (PDX) model mice established from PT14, monitored every day, are presented as means  $\pm$  SD. Female mice were treated with sorafenib (●), everolimus (▲), or their combination (★); mice administered saline (■) served as controls. **(B)** Body weights of PDX model mice established from PT12, monitored three times a week, are presented as means  $\pm$  SD. Female mice were treated with docetaxel (●, 3 mg/kg), bevacizumab (▲, 5 mg/kg), or their combination (★) by intraperitoneal injection three times a week for 4 weeks; mice administered saline (■) served as controls. **(C, D)** Weights of PDX tumors from PT9 and PT10, monitored three times a week, are presented as means  $\pm$  SD. Female mice were administered PX-478 (●, 10 mg/kg), neratinib (▲, 20 mg/kg), or their combination (★), via oral gavage three times a week in female mice for 40 days (C) and 30 days (D); mice administered saline (■) served as controls.

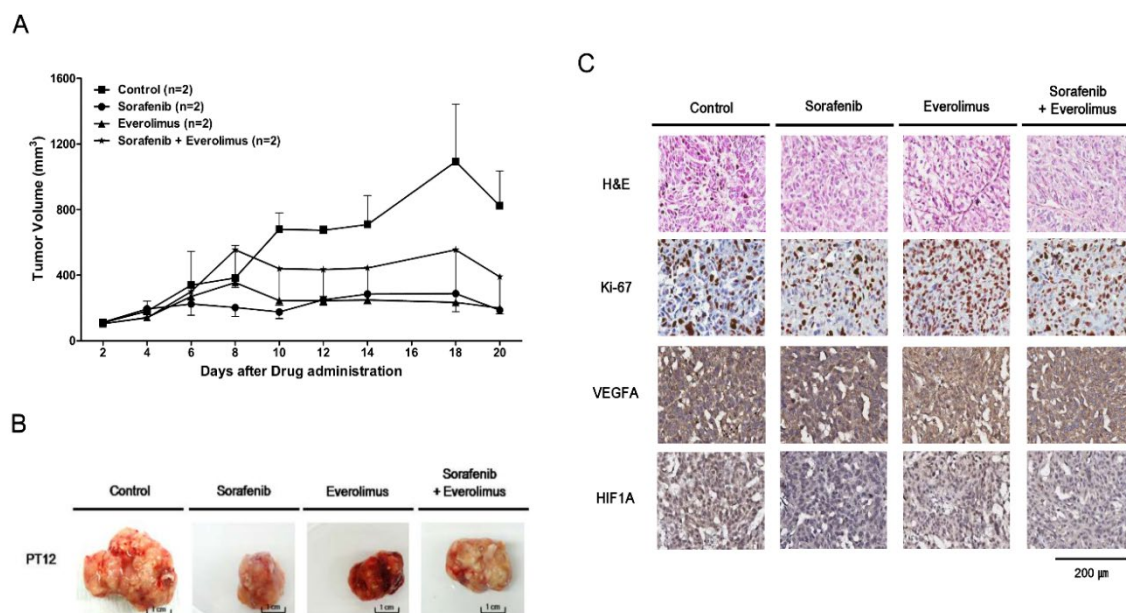

**Figure S2.** In vivo efficacy of sorafenib and everolimus against PDX models from PT12 (TNBC subtype) (A) Tumor volumes (F2) were determined in female mice ( $n = 2$ ) treated with sorafenib (●, 120 mg/kg), everolimus (▲, 20 mg/kg), or their combination (★), given orally by gavage once a day; mice administered saline (■) served as controls. Tumor volumes are presented as means  $\pm$  SD;  $p$ -values (unpaired t-test) at 20 days are shown ( $p > 0.2$  for control vs. sorafenib, control vs. everolimus and control vs. sorafenib + everolimus). (B) Images of PT12 PDX model tumors from mice treated with sorafenib, everolimus, or their combination. (C) H&E staining and immunohistochemical analyses of Ki-67, VEGFA, and HIF1A in PT12 PDX tumors after treatment of tumor-bearing mice with drugs. Scale bar, 200  $\mu$ m.

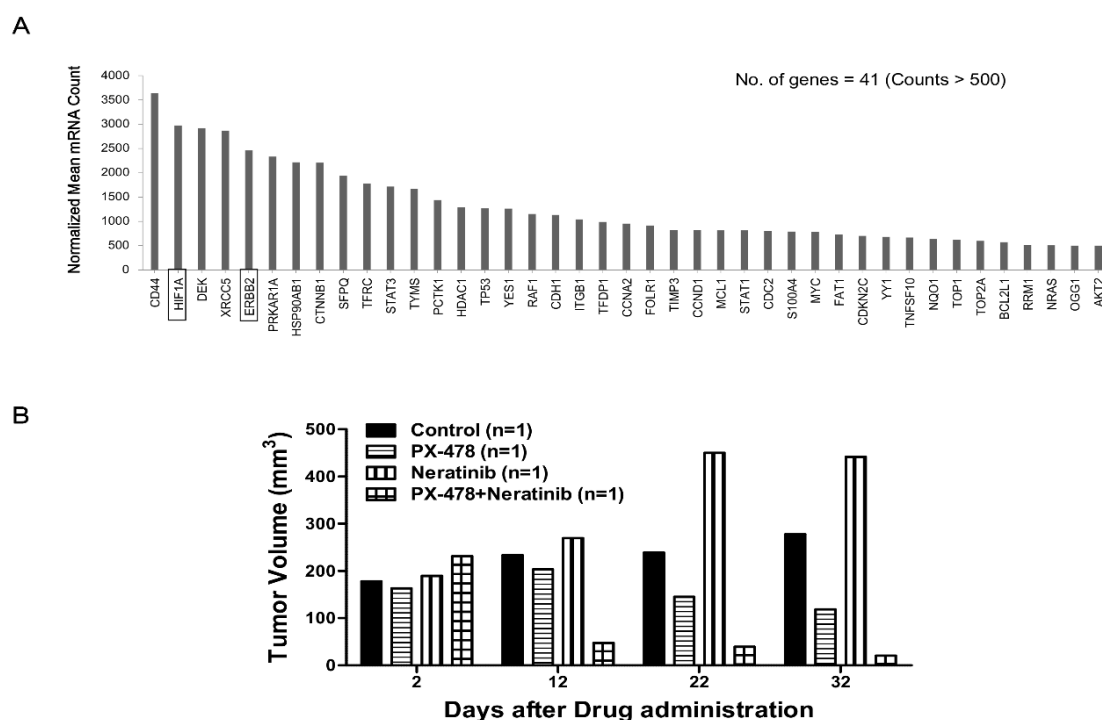

**Figure S3.** Gene expression analysis using a Nanostring nCounter GX human cancer reference kit and efficacy tests of PX-478 and neratinib against PDX models from PT5 (HR/HER2<sup>+</sup> subtype). (A) The Nanostring nCounter System was used to examine gene expression profiles of PDX tumors (F2) from

PT5. The top upregulated 41 genes with counts >500 were selected among the 230 human cancer-related genes. (B) Tumor volumes (F4) were measured at 2, 12, 22, and 32 days in female mice ( $n = 1$ ) treated with PX-478 (■, 30 mg/kg), neratinib (▣, 40 mg/kg), or their combination (▤), given orally by gavage, every other day; mice administered saline (■) served as controls.

**Table S1.** Clinical features of patient-derived xenograft tumors from 17 patients.

| No. | Patient | ER | PR | HER2 | Tumor site/Source       | Histology | Days to generate 100 mm <sup>3</sup> F1 tumors ( $p = 0.830$ *) |
|-----|---------|----|----|------|-------------------------|-----------|-----------------------------------------------------------------|
| 1   | PT1     | +  | +  | −    | Breast (Rt.)/surgery    | IDC       | 37                                                              |
| 2   | PT2     | +  | +  | +    | LN (Lt. axilla)/biopsy  | IDC       | 23                                                              |
| 3   | PT3     | +  | −  | +    | Breast (Rt.)/surgery    | IDC       | 26                                                              |
| 4   | PT4     | +  | +  | +    | Chest wall (Lt.)/biopsy | IDC       | 186                                                             |
| 5   | PT5     | −  | −  | +    | Breast (Rt.)/biopsy     | IDC       | 94                                                              |
| 6   | PT5     | −  | −  | +    | Breast (Rt.)/surgery    | IDC       | 55                                                              |
| 7   | PT6     | −  | −  | +    | Breast (Lt.)/biopsy     | IDC       | 33                                                              |
| 8   | PT7     | −  | −  | +    | Breast (Lt.)/surgery    | IDC       | 68                                                              |
| 9   | PT8     | −  | −  | +    | Breast (Rt.)/surgery    | IDC       | 5                                                               |
| 10  | PT9     | −  | −  | +    | Breast (Lt.)/surgery    | IDC       | 71                                                              |
| 11  | PT10    | −  | −  | +    | Breast (Rt.)/surgery    | Mucinous  | 137                                                             |
| 12  | PT11    | −  | −  | −    | LN (Lt. axilla)/biopsy  | IDC       | 112                                                             |
| 13  | PT11    | −  | −  | −    | Breast (Lt.)/surgery    | IDC       | 55                                                              |
| 14  | PT12    | −  | −  | −    | Breast (Rt.)/biopsy     | IDC       | 51                                                              |
| 15  | PT12    | −  | −  | −    | Breast (Rt.)/surgery    | IDC       | 78                                                              |
| 16  | PT13    | −  | −  | −    | Breast (Rt.)/surgery    | IDC       | 64                                                              |
| 17  | PT14    | −  | −  | −    | Breast (Lt.)/surgery    | IDC       | 35                                                              |
| 18  | PT15    | −  | −  | −    | LN (Neck)/surgery       | IDC       | 52                                                              |
| 19  | PT16    | −  | −  | −    | Breast (Rt.)/surgery    | IDC       | 20                                                              |
| 20  | PT17    | −  | −  | −    | Breast (Rt.)/surgery    | IDC       | 47                                                              |

ER, estrogen receptor; PR, progesterone receptor; HER2, human epidermal growth factor 2; IDC, invasive ductal carcinoma; Rt., right; Lt., left. \* Kruskal–Wallis test.

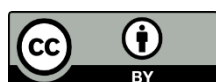

© 2019 by the authors. Licensee MDPI, Basel, Switzerland. This article is an open access article distributed under the terms and conditions of the Creative Commons Attribution (CC BY) license (<http://creativecommons.org/licenses/by/4.0/>).
